# Supplementary material for: Boundary-layer transition in the age of data: from a comprehensive dataset to fine-grained prediction
Source: Research Square preprint supplement (doi:10.21203/rs.3.rs-7130917/v1), 2025-07-28
Supplement: Supplementary file 1 [file Readme.docx]

I. Fluid Dynamics Stability Analysis Code

1. System Requirements

**Software Dependencies**

- MATLAB Version: R2023a (Product Version 9.14.0.2182215)
- Toolboxes: Base MATLAB only (no additional toolboxes required)
- Data Files: Place the following in the main code directory: Table_Ma0.mat( Precomputed mode eigenvalue interpolation table for LST analysis)

**Operating System**: Windows 11 Pro ( Version 24H2, OS Build 26100.4652)

**Hardware**

- Processor: Intel® Core™ i9-14900K
- RAM: 128 GB
- Storage: 5 TB (for code, data, and outputs)

2. Installation Guide

1. Download the code package and extract it to a local directory (e.g., ./fluid_stability_analysis/).
2. Ensure Table_Ma0.mat is placed in the main code directory.
3. Launch MATLAB, navigate to the code directory (cd command), and execute: main_secondary_Ma0

Alternatively, double-click the main script file.

**Typical Installation Time**: 2–3 minutes (file extraction + path setup).

3. Demonstration

**Execution Steps**

1. Complete all installation steps above.
2. By default, the code runs iterations 2901–3000 (modify for iter = 2901:3000 in the script to adjust).
3. Outputs generated automatically:

**Log Files**: secondary_Ma0_xxx.txt (runtime logs, mode parameters, residuals).

**Result Files**: result_0xxx.mat (flow field perturbations Fai, eigenvalues alf, mode parameters modes).

**Expected Outputs**

- Log File Example:


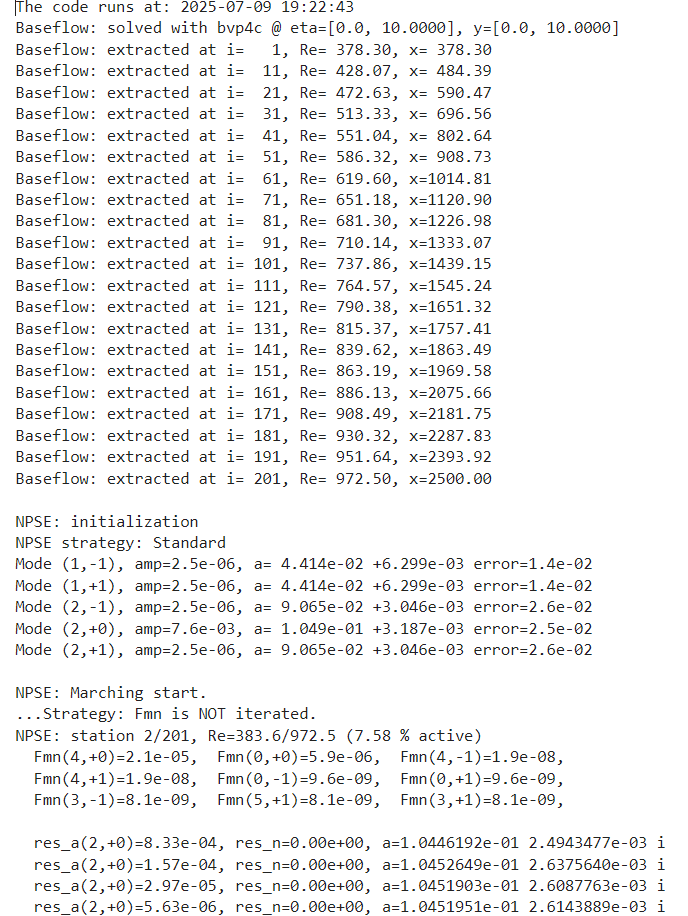


- Result Files: Load in MATLAB via load('result_02901.mat').

**Runtime**

- Per iteration (e.g., iter=2901): ~3 minutes (hardware-dependent).
- Full 3000 iterations: ~150 hours.

4. Usage Instructions

**Basic Configuration**

Modify parameters in the Case structure:

Case.xmax = 1.5; % Max computational domain length

Mesh.Nx = 500; % Spatial grid points

Case.itermax = 1000; % Max iterations

Case.res_a = 1e-6; % Residual convergence threshold

**Reproducibility**

- Use identical Table_Ma0.mat.
- Fix the random number seed.

II. Machine Learning Model for Fluid Dynamics Prediction

1. System Requirements

**Software Dependencies**

- Python:3.12
- Libraries: pip install numpy pandas scikit-learn torch tensorflow xgboost h5py
- Core: numpy, pandas, scikit-learn, h5py≥3.6.0
- ML: xgboost, torch (PyTorch for KAN), tensorflow (Keras for DNN/LSTM/CNN/Transformer)

**Operating System**

Windows 11 Pro (Version 24H2, OS Build 26100.4652)

**Hardware**

- Processor: Intel® Core™ i9-14900K
- RAM: 128 GB
- GPU: 8 GB VRAM
- Storage: 5 TB

2. Installation Guide

1. Download:

- Code: prediction.py
- Data: Ma0.mat (Place at E:\fluid\paper_1\Figure\python_figure\ or modify path in load_and_preprocess).

1. Install dependencies (see above).
2. Validate environment:

import torch, tensorflow, xgboost # No errors expected

**Typical Installation Time**:~5 minutes (network-dependent).

3. Demonstration

**Execution Steps**

1. Verify Ma0.mat path in load_and_preprocess().
2. Run: python prediction.py

**Workflow:**

- Load/preprocess data (standardization, train/test split).
- Train 7 models: DNN, LSTM, CNN, Transformer, RandomForest, XGBoost, KAN.
- Output metrics: MAE, RAE, R², training time.

**Expected Output**

- Console: Training progress (e.g., "Training Transformer...").
- Results stored in results dictionary (predictions y_pred, ground truth y_true, metrics).

**Runtime**

Total:~15 minutes (standard desktop, no GPU).

- Tree models (RF/XGBoost): ~0.5 sec each.
- DNN/CNN/Transformer/KAN: ~1 min each.
- LSTM: ~5 min.

4. Usage Instructions

**Data Specification**

- Input (X): Shape (3000, 50, 3) (3000 samples × 50 timesteps × 3 positions).
- Output (y): Shape (3000, 1) (transition location per sample).

**Parameter Tuning**

- Train/Test Split: Adjust test_size in train_test_split (default: 0.2).
- Epochs: Modify epochs (e.g., DNN default: 300).
- Architecture:
  - DNN hidden layers: e.g., Dense(512) → Dense(256).
  - Transformer heads: e.g., num_heads=4.
  - Learning Rate: e.g., Adam(0.0005).

**Reproducibility**

- Use identical xxx.mat.
- Fix random seeds

Contact the authors for further assistance.
