# Supplementary material for: Boundary-layer transition in the age of data: from a comprehensive dataset to fine-grained prediction
Source: Research Square preprint supplement (doi:10.21203/rs.3.rs-7130917/v1), 2025-07-28
Supplement: Supplementary file 4 [file figure2.xlsx]

## Sheet: figure2b
-36.0475	-137.499	96.7217	41.7837	-19.0816	5.22681	4.38708	-40.0424	-32.2161	13.0862	-171.471	-64.4775	91.1	54.9019	-57.8291	10.2194	136.318	5.52026	25.4644	-15.3512	26.9897	34.2586	-7.46204	-39.8401	2.54468	-45.4517	-40.8746	60.1545	-54.3776	-0.214722	-1.70703	73.3428	-0.0316162	67.0586	57.6157	-50.8644	-21.2386	-126.314	-23.2491	23.8434	33.6713	-35.6924	16.012	104.294	62.7239	46.3274	10.3972	43.2379	-31.2981	22.2191
-49.0007	-51.2119	74.553	4.90936	26.7213	54.9274	15.0823	-3.26282	-7.36047	-0.296021	-6.91479	-3.52795	-10.8257	28.8612	-5.96228	-12.3882	56.3904	6.01282	-52.874	0.528564	52.9046	16.1302	-8.24121	-12.694	-0.761475	-26.3939	-19.9174	31.8081	2.34155	-6.53516	-7.36841	10.6932	27.1506	19.0713	-4.47803	-23.8458	-7.23596	-5.79236	-2.61499	-2.06873	85.0716	-17.8387	9.25275	19.2212	-10.2562	-17.3992	-2.34033	1.92578	-11.3725	-36.5844
-7.46454	-75.4822	-5.09387	15.8643	11.6404	35.6027	-1.50891	6.17676	13.3583	0.980469	-71.777	10.0502	96.1776	60.4622	-41.3143	-15.8408	92.147	62.3385	-19.5782	-23.233	57.7052	45.7272	-38.4347	10.1948	-14.1561	0.994019	-6.4021	45.8755	40.6133	-105.363	-2.70825	45.5142	92.1808	35.5763	-25.8835	-60.2366	-26.9031	-52.6627	-59.9349	-24.0372	46.3417	11.3735	66.1946	50.3849	68.4702	40.7057	-25.0182	86.2455	27.6622	-15.317
-27.1395	-26.4528	9.78394	-13.5237	-6.9845	36.3815	-65.4114	-54.5799	-12.8225	46.0675	-99.2623	42.3082	37.8694	45.7542	-3.49072	-5.04578	191.377	65.963	80.0017	-47.957	58.0522	96.3572	21.1875	6.37415	-1.13867	5.16541	5.53516	50.4641	5.95667	-91.4073	-62.3383	15.1547	92.7137	83.9893	-18.1593	-73.9042	9.55603	-1.36908	-44.3964	-21.9325	98.1536	13.7363	139.325	19.3315	115.166	1.28503	39.5785	19.3705	15.9604	-36.0305
-3.66279	-14.366	17.2002	2.95921	5.65802	0.200813	-7.21946	15.59	18.1892	-8.19146	-18.8356	7.58408	20.4063	20.8806	-19.6426	-0.111138	20.6705	2.82502	-18.522	3.21918	8.93562	2.44954	-11.8866	-2.93179	7.9199	-2.04188	-3.16238	8.42199	21.2708	-12.0199	9.50559	2.62681	33.4648	-4.9074	-1.91227	-7.07935	-0.135642	-3.90395	0.921732	-10.2783	26.7754	1.24746	40.8654	31.5689	22.8673	2.25348	0.0327123	13.8846	10.0175	0.310202
-1.03351	-2.17822	2.52332	0.607361	1.0332	0.562378	-0.143921	0.688782	-0.0926514	-0.365784	-1.89685	0.937561	0.433167	1.56091	-3.33044	-1.34277	3.62793	1.20325	-2.42944	1.13464	1.47388	0.485657	-0.745117	-0.577637	0.689819	-2.12463	-0.881958	2.52075	-0.0045166	-1.50781	1.61414	0.776855	0.979248	1.47424	-0.454956	-1.17285	-1.09082	-0.830505	0.372498	0.95752	1.40387	0.870483	0.871948	1.93994	1.00012	-1.73877	0.9823	1.50171	-0.208679	-0.987305
-17.8736	-110.809	29.3938	51.6514	-16.6224	23.2802	-40.255	12.6393	12.1951	3.92419	-96.428	7.35461	168.076	58.829	-76.7728	-10.2888	156.751	28.5375	44.9122	-16.9083	43.9786	27.4583	-25.5294	-21.6622	1.57971	-26.8918	-5.61487	64.1356	39.9106	-66.037	-7.8429	80.2791	13.235	25.5687	23.9617	-46.4799	-27.0922	-44.8222	-63.0803	7.22449	62.4634	-17.2556	34.4985	68.498	80.4902	29.2357	-5.20007	59.8851	9.9845	13.3943
[truncated: 550 more columns]

## Sheet: figure2c
dnn	lstm	cnn	transformer	rf	xgb	kan
[ 707.1653 792.0332 1280.0237 919.3351 1004.203 908.7266 1608.8868 823.8587 1237.5897 845.0757 1067.8539 696.5568 823.8587 1120.8964 1661.9293 1110.2878 1375.5001 1110.2878 1492.1935 1301.2407 898.1181 707.1653 1354.2832 1120.8964 1269.4153 1142.1134 1036.0284 1205.7643 834.46716 1386.1086 1057.2455 919.3351 961.76904 1513.4105 1449.7595 1354.2832 1269.4153 802.6417 834.46716 1131.5049 845.0757 1…	[ 707.1653 792.0332 1280.0237 919.3351 1004.203 908.7266 1608.8868 823.8587 1237.5897 845.0757 1067.8539 696.5568 823.8587 1120.8964 1661.9293 1110.2878 1375.5001 1110.2878 1492.1935 1301.2407 898.1181 707.1653 1354.2832 1120.8964 1269.4153 1142.1134 1036.0284 1205.7643 834.46716 1386.1086 1057.2455 919.3351 961.76904 1513.4105 1449.7595 1354.2832 1269.4153 802.6417 834.46716 1131.5049 845.0757 1…	[ 707.1653 792.0332 1280.0237 919.3351 1004.203 908.7266 1608.8868 823.8587 1237.5897 845.0757 1067.8539 696.5568 823.8587 1120.8964 1661.9293 1110.2878 1375.5001 1110.2878 1492.1935 1301.2407 898.1181 707.1653 1354.2832 1120.8964 1269.4153 1142.1134 1036.0284 1205.7643 834.46716 1386.1086 1057.2455 919.3351 961.76904 1513.4105 1449.7595 1354.2832 1269.4153 802.6417 834.46716 1131.5049 845.0757 1…	[ 707.1653 792.0332 1280.0237 919.3351 1004.203 908.7266 1608.8868 823.8587 1237.5897 845.0757 1067.8539 696.5568 823.8587 1120.8964 1661.9293 1110.2878 1375.5001 1110.2878 1492.1935 1301.2407 898.1181 707.1653 1354.2832 1120.8964 1269.4153 1142.1134 1036.0284 1205.7643 834.46716 1386.1086 1057.2455 919.3351 961.76904 1513.4105 1449.7595 1354.2832 1269.4153 802.6417 834.46716 1131.5049 845.0757 1…	[ 707.1653 792.0332 1280.0237 919.3351 1004.203 908.7266 1608.8868 823.8587 1237.5897 845.0757 1067.8539 696.5568 823.8587 1120.8964 1661.9293 1110.2878 1375.5001 1110.2878 1492.1935 1301.2407 898.1181 707.1653 1354.2832 1120.8964 1269.4153 1142.1134 1036.0284 1205.7643 834.46716 1386.1086 1057.2455 919.3351 961.76904 1513.4105 1449.7595 1354.2832 1269.4153 802.6417 834.46716 1131.5049 845.0757 1…	[ 707.1653 792.0332 1280.0237 919.3351 1004.203 908.7266 1608.8868 823.8587 1237.5897 845.0757 1067.8539 696.5568 823.8587 1120.8964 1661.9293 1110.2878 1375.5001 1110.2878 1492.1935 1301.2407 898.1181 707.1653 1354.2832 1120.8964 1269.4153 1142.1134 1036.0284 1205.7643 834.46716 1386.1086 1057.2455 919.3351 961.76904 1513.4105 1449.7595 1354.2832 1269.4153 802.6417 834.46716 1131.5049 845.0757 1…	[ 707.1653 792.0332 1280.0237 919.3351 1004.203 908.7266 1608.8868 823.8587 1237.5897 845.0757 1067.8539 696.5568 823.8587 1120.8964 1661.9293 1110.2878 1375.5001 1110.2878 1492.1935 1301.2407 898.1181 707.1653 1354.2832 1120.8964 1269.4153 1142.1134 1036.0284 1205.7643 834.46716 1386.1086 1057.2455 919.3351 961.76904 1513.4105 1449.7595 1354.2832 1269.4153 802.6417 834.46716 1131.5049 845.0757 1…
[ 671.1178 654.53424 1376.7454 961.1188 985.1214 913.9534 1613.2739 783.8163 1205.3737 858.16187 896.38257 632.0793 914.95874 1175.7982 1604.1002 1120.5072 1511.8176 1115.8081 1517.6578 1285.8895 925.10785 741.4239 1346.8212 1081.0563 1271.96 1096.6617 995.1538 1265.9188 780.08954 1385.8939 1055.5385 992.6779 961.7374 1580.4691 1507.3752 1303.4188 1248.1766 676.3273 811.2181 1155.3483 878.747 109…	[ 658.1646 740.8213 1354.5767 924.24445 1030.9243 963.65405 1623.9691 820.5959 1230.2292 844.77966 1060.9391 693.0289 813.033 1149.7576 1655.967 1097.8997 1431.8905 1116.3007 1439.3195 1301.7693 951.0227 723.2955 1346.042 1108.2024 1268.6538 1115.7195 1016.1111 1237.5724 836.8087 1379.5735 1049.8771 930.02826 988.9196 1532.4818 1445.2815 1330.4374 1262.1793 796.84937 831.8522 1129.4362 930.1473 1…	[ 699.70074 716.55096 1274.9298 935.19934 1015.8434 944.32935 1607.3779 830.03546 1250.948 846.05615 996.0769 706.607 920.03625 1181.3585 1620.615 1094.447 1467.6471 1172.6263 1472.6152 1278.0077 955.8233 752.8925 1315.8485 1131.0912 1255.2592 1143.1074 1029.6263 1251.6398 875.0805 1280.7452 1054.5372 964.84924 1053.9498 1548.9868 1423.876 1294.0466 1242.5122 749.979 774.5323 1107.4677 891.41736 …	[ 680.0258 765.5804 1289.8076 905.8114 997.2185 945.10815 1543.4755 769.2788 1224.7672 891.1432 968.5916 738.86505 861.7281 1166.6505 1658.4386 1105.2421 1566.8771 1176.2509 1572.1952 1253.2837 956.17035 803.52246 1375.4707 1127.2705 1268.2766 1147.2788 1041.5636 1256.2284 840.4238 1294.7013 994.9072 934.48975 1054.4828 1597.3998 1431.6002 1280.379 1278.9713 801.27264 790.07074 1109.5724 943.2293…	[ 703.50249358 777.66724549 1297.22384579 922.29429469 1009.86102354 908.92743685 1601.66738332 839.4487402 1255.7789623 836.88422588 1049.01823374 704.14090601 844.26505128 1141.77695643 1642.28676015 1110.17670401 1396.17062806 1113.11286418 1473.67145433 1304.4599034 907.05372242 709.61482375 1342.39664621 1117.96457037 1277.33517883 1140.07152742 1032.86605755 1214.18627312 855.73800133 1374.…	[ 706.1318 789.855 1282.547 919.94244 1005.2362 909.289 1608.7429 824.5475 1237.4971 844.7099 1065.957 697.4944 824.2919 1122.4573 1658.5989 1108.9451 1379.128 1111.4911 1489.764 1302.3754 899.592 707.65094 1353.5381 1120.3187 1270.1051 1139.9888 1035.1465 1208.285 834.46265 1384.6008 1058.8596 920.11194 962.7483 1514.8848 1449.3046 1353.1104 1268.3245 801.8112 834.83966 1132.4624 846.47955 1132.…	[ 689.2917 681.22394 1309.4175 970.9865 987.58057 932.0068 1568.6318 836.49805 1249.7848 848.9999 971.4259 703.91144 991.93427 1179.7253 1585.1565 1099.999 1532.2512 1138.8253 1537.1057 1284.3324 942.0967 734.62354 1328.7538 1099.2341 1270.995 1115.2216 1030.4136 1269.8999 874.3778 1320.0717 1049.4026 999.61414 975.004 1538.9792 1473.7212 1307.8033 1242.3231 757.8195 771.3869 1138.7294 907.53906 …
