# Supplementary material for: Boundary-layer transition in the age of data: from a comprehensive dataset to fine-grained prediction
Source: Research Square preprint supplement (doi:10.21203/rs.3.rs-7130917/v1), 2025-07-28
Supplement: Supplementary file 8 [file pre1.xlsx]

## Sheet: Sheet1
	MAE	RAE	R2	TIME
CNN	132.2441864013672	0.12681749979654947	0.7722664475440979	18.310190677642822
DNN	100.4800796508789	0.09355723063151042	0.8557226061820984	22.181852102279663
KAN	109.49652099609375	0.10249477386474609	0.8365241885185242	2.827688455581665
lstm	44.00288391113281	0.040915578206380206	0.9508649706840515	241.78405046463013
rf	12.881368268438496	0.012346142187265912	0.9941599925760842	6.408580541610718
xg	2.758237600326538	0.0025955402851104738	0.9998137950897217	0.34853291511535645
transformer	279.1134338378906	0.2673896026611328	-0.00289774	41.62575817108154
