# Supplementary material for: Boundary-layer transition in the age of data: from a comprehensive dataset to fine-grained prediction
Source: Research Square preprint supplement (doi:10.21203/rs.3.rs-7130917/v1), 2025-07-28
Supplement: Supplementary file 12 [file pre2.xlsx]

## Sheet: Sheet1
	MAE	RAE	R2	TIME
CNN	44.872955322265625	0.04202797571818034	0.9650364518165588	21.995496034622192
DNN	38.935543060302734	0.037053394317626956	0.9762434363365173	22.741756439208984
KAN	40.68412780761719	0.03924773534138997	0.9727019667625427	3.4568722248077393
lstm	13.981546401977539	0.013098599910736084	0.9955669045448303	214.04642486572266
rf	5.662705246445389	0.005368053108383486	0.9986421493005705	12.345227003097534
xg	0.7944808006286621	0.0007441894213358561	0.9999858736991882	0.542640209197998
transformer	74.95590209960938	0.06827295939127605	0.91291344165802	44.37342810630798
