# Supplementary material for: Boundary-layer transition in the age of data: from a comprehensive dataset to fine-grained prediction
Source: Research Square preprint supplement (doi:10.21203/rs.3.rs-7130917/v1), 2025-07-28
Supplement: Supplementary file 16 [file pre3.xlsx]

## Sheet: Sheet1
	MAE	RAE	R2	TIME
CNN	40.977088928222656	0.038005733489990236	0.9719727039337158	22.147418975830078
DNN	38.76659393310547	0.035634606679280596	0.974351704120636	23.683576107025146
KAN	35.11250686645508	0.034373111724853515	0.9789304733276367	3.097768545150757
lstm	15.082210540771484	0.014037982622782389	0.9935286045074463	257.4266428947449
rf	4.884562900527479	0.004712298047345911	0.9989586096647548	17.787800073623657
xg	0.6317474246025085	0.0005954042077064514	0.9999918937683105	0.7978987693786621
transformer	55.393123626708984	0.05201933224995931	0.9526604413986206	42.04088068008423
