# Supplementary material for: Boundary-layer transition in the age of data: from a comprehensive dataset to fine-grained prediction
Source: Research Square preprint supplement (doi:10.21203/rs.3.rs-7130917/v1), 2025-07-28
Supplement: Supplementary file 20 [file pre4.xlsx]

## Sheet: Sheet1
	MAE	RAE	R2	TIME
CNN	40.43931579589844	0.03807411193847656	0.9708881378173828	22.36439609527588
DNN	40.796958923339844	0.03917560895284017	0.9723102450370789	23.905739307403564
KAN	38.06903076171875	0.036855033238728845	0.9741550087928772	3.6304233074188232
lstm	8.783126831054688	0.008684266408284505	0.9980078935623169	213.79273557662964
rf	4.862043467984461	0.004662144750751535	0.998967198778732	23.24042510986328
xg	0.6240599751472473	0.0005801002184549968	0.9999919533729553	0.9771523475646973
transformer	53.697959899902344	0.04951327323913574	0.9533198475837708	44.04797387123108
