# Supplementary material for: Boundary-layer transition in the age of data: from a comprehensive dataset to fine-grained prediction
Source: Research Square preprint supplement (doi:10.21203/rs.3.rs-7130917/v1), 2025-07-28
Supplement: Supplementary file 24 [file pre5.xlsx]

## Sheet: Sheet1
	MAE	RAE	R2	TIME
CNN	38.32098388671875	0.03624698003133138	0.9740230441093445	23.03662347793579
DNN	32.205875396728516	0.030047391255696613	0.9812710881233215	24.95782470703125
KAN	35.52386474609375	0.034636494318644205	0.9779272079467773	3.8021531105041504
lstm	14.787633895874023	0.014130218823750814	0.9949596524238586	290.33904361724854
rf	5.024273673426272	0.004817990446899423	0.9988525032833926	29.616944313049316
xg	0.5679725408554077	0.0005343794822692871	0.9999929070472717	1.3134291172027588
transformer	46.69768142700195	0.043684527079264325	0.962216854095459	46.72036862373352
