# Supplementary material for: Boundary-layer transition in the age of data: from a comprehensive dataset to fine-grained prediction
Source: Research Square preprint supplement (doi:10.21203/rs.3.rs-7130917/v1), 2025-07-28
Supplement: Supplementary file 28 [file pre6.xlsx]

## Sheet: Sheet1
	MAE	RAE	R2	TIME
CNN	35.93647003173828	0.033165232340494795	0.9768832921981812	19.28234839439392
DNN	34.745521545410156	0.032696046829223634	0.9801545143127441	25.65023446083069
KAN	34.160789489746094	0.033281068801879886	0.9796257019042969	2.3710250854492188
lstm	13.09666633605957	0.012749701340993246	0.9967807531356812	210.54586005210876
rf	4.60365056629355	0.004509395179609357	0.9990942625178593	34.985888957977295
xg	0.46920329332351685	0.0004354354739189148	0.9999951124191284	1.380692481994629
transformer	47.391178131103516	0.04357698440551758	0.9628777503967285	41.86842393875122
